# Supplementary material
Source: Springer Nature journal article supplement (https://www.springermedizin.de/resource/supplementary/12967_2011_790_MOESM5_ESM.pdf/9577064)

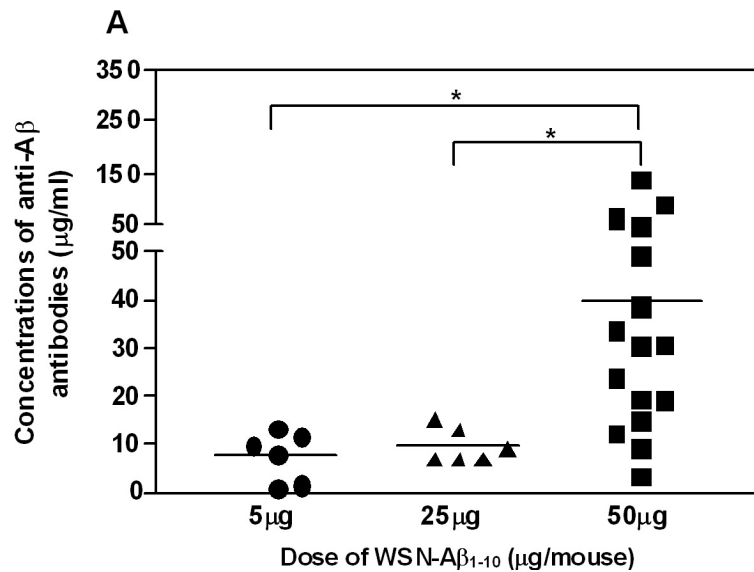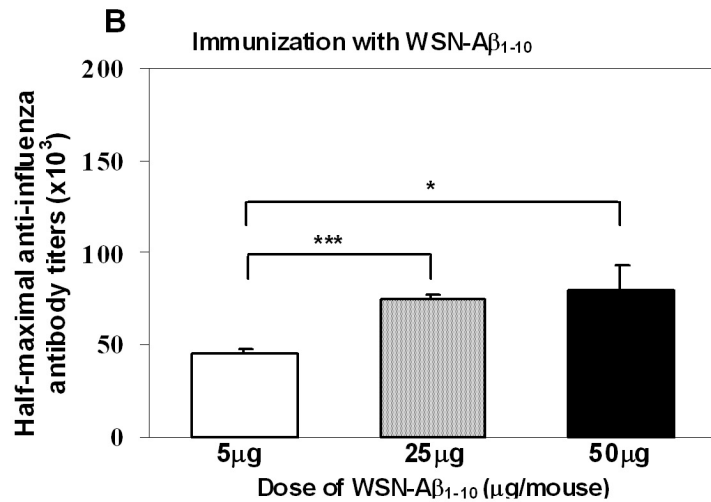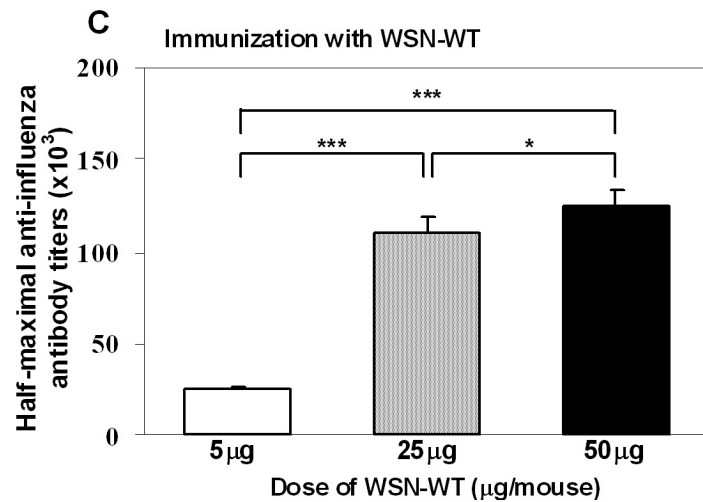

Supplement: MOESM5 [file 9577064]
